# Supplementary material
Source: MDPI journal article supplement (https://www.mdpi.com/2379-139X/9/3/80)
Supplement: s1 [file s1]

### **Criteria for definition of Cytokine storm**

Laboratory results at baseline have been used to define the presence of CS as defined by published criteria in COVID-19 pneumonia: ferritin >250 ng/mL, CRP >4.6mg/dL, and at least one abnormality in three clusters of laboratory variables. The first cluster included albumin <2.8 g/dL, lymphocytes <10.2%, or neutrophils >11400/mm<sup>3</sup>, the second cluster included alanine aminotransferase >60U/l, aspartate aminotransferase >87 U/l, D-dimers >4930 ng/mL, LDH >416 U/l or Troponin I >1.09 ng/ml, and the third cluster included anion gap<6.8 mmol/l, chloride >106 mmol/l, potassium >4.9 mmol/l, or blood urea nitrogen/creatinine ratio >29.
